# Supplementary material for: Cell atlas of human psoriasis and epidermal specific Ube2l3 deficiency mouse highlighting CXCL16/CXCR6 orchestrating the development of psoriasis
Source: Research Square preprint supplement (doi:10.21203/rs.3.rs-5973089/v1), 2025-02-28
Supplement: Supplementary file 1 [file 4200abb55b76f7e7576a3094.pdf]

1 **Supplementary information**

2 **Table S1 REAGENT or RESOURCE**

| REAGENT or RESOURCE                          | SOURCE       | IDENTIFIER      |
|----------------------------------------------|--------------|-----------------|
| Antibodies                                   |              |                 |
| rabbit anti-UBE2L3                           | GeneTex      | Cat#: GTX104717 |
| mouse anti-human IL-1 $\beta$                | R&D          | Cat#: MAB201    |
| goat anti-mouse IL-1 $\beta$                 | R&D          | Cat#: AF401-NA  |
| rabbit anti- $\beta$ -actin                  | CST          | Cat#:4970S      |
| rabbit anti-STAT3                            | CST          | Cat#:124H6      |
| rabbit anti-pSTAT3                           | CST          | Cat#:9131       |
| mouse anti-mouse CD11c                       | Abcam        | Cat#: ab11029   |
| rabbit anti-human/mouse Ki-67                | Abcam        | Cat#: ab15580   |
| rabbit anti-K14                              | Abcam        | Cat#: ab181595  |
| rabbit anti-Loricrin                         | Proteintech  | Cat#:55439-1-AP |
| mouse anti-cytokeratin 1/10                  | Santa Cruz   | Cat#: LH1       |
| Brilliant Violet 510 anti-mouse CD45         | Biolegend    | Cat#: 157219    |
| FITC anti-mouse I-A/I-E                      | Biolegend    | Cat#:107606     |
| Brilliant Violet 421 anti-mouse CD11c        | BD           | Cat#:562782     |
| PE/Dazzle™ 594 anti-mouse/human CD207        | Biolegend    | Cat#:144212     |
| PE-CY7 anti-mouse CD103                      | Biolegend    | Cat#:121426     |
| efluor660 anti-mouse IL23p19                 | ThermoFisher | Cat#:50-7023-82 |
| Brilliant Violet 650 anti-mouse TNF $\alpha$ | Biolegend    | Cat#:506333     |
| FITC anti-mouse CD3                          | Biolegend    | Cat#:100204     |

|                                              |             |                 |
|----------------------------------------------|-------------|-----------------|
| PerCP/Cyanine5.5 anti-mouse CD4              | Biolegend   | Cat#:100434     |
| APC anti-mouse CD8                           | BD          | Cat#:553035     |
| PE anti-mouse TCR $\gamma\delta$             | Biolegend   | Cat#:118108     |
| PE-CY7 anti-mouse IL-17A                     | Biolegend   | Cat#:506922     |
| PE anti-mouse CXCL16                         | BD          | Cat#:566740     |
| APC/Cyanine7 anti-mouse CXCR6                | Biolegend   | Cat#:151124     |
| PE anti-mouse TCR V $\gamma$ 2               | Biolegend   | Cat#: 137705    |
| APC anti-mouse TCR V $\gamma$ 2              | Biolegend   | Cat#: 137707    |
| FITC Hamster Anti-Mouse V $\gamma$ 3 TCR     | BD          | Cat#: 110067    |
| APC anti-mouse Ki-67                         | Biolegend   | Cat#:652406     |
| Brilliant Violet 510 anti-human CD45         | Biolegend   | Cat#:368526     |
| APC/Fire™ 750 anti-human HLA-DR              | Biolegend   | Cat#:327024     |
| FITC anti-human CD3                          | Biolegend   | Cat#:300440     |
| PE/Cyanine7 anti-human CD4                   | Biolegend   | Cat#:357410     |
| APC anti-human CD8                           | BD          | Cat#:570892     |
| PE anti-human IL-17A                         | Biolegend   | Cat#:512306     |
| Brilliant Violet 785 anti-human TNF $\alpha$ | Biolegend   | Cat#:502948     |
| BV421 anti-human CD11c                       | BD          | Cat#:566877     |
| eFluor 660 anti-human IL-23p19               | eBioscience | Cat#:50-7023-82 |
| PE anti-human CXCL16                         | Biolgend    | Cat#:360803     |
| PE/Cyanine7 anti-human CD186 (CXCR6)         | Biolegend   | Cat#:356011     |
| PerCP/Cyanine5.5 anti-human CD186 (CXCR6)    | Biolegend   | Cat#:356009     |

|                                                                                |                 |                  |
|--------------------------------------------------------------------------------|-----------------|------------------|
| Rabbit Anti-CD31 antibody                                                      | abcam           | Cat#: ab182981   |
| Chemicals and recombinant proteins                                             |                 |                  |
| Dispase II                                                                     | Gibco           | Cat#: 17105041   |
| Protease and Phosphatase Inhibitor Single-Use Cocktail (100x)                  | Thermo Fisher   | Cat#: 78442      |
| EpiGRO™ Human Epidermal Keratinocyte Complete Culture Media Kit                | Millipore       | Cat#: SCMK001    |
| FBS                                                                            | Gibco           | Cat#: 10270-106  |
| Trypsin                                                                        | Gibco           | Cat#: T4424      |
| Collagen IV                                                                    | Sigma           | Cat#:C5533       |
| RPMI medium 1640                                                               | Gibco           | Cat#: 21875-034  |
| Penicillin-Streptomycin                                                        | Gibco           | Cat#: 15140122   |
| Tris                                                                           | Sigma           | Cat#: 252859     |
| Sodium Chloride (NaCl)                                                         | Sigma           | Cat#: S5886      |
| Hanks                                                                          | Cienry          | Cat#:24020       |
| Foxp3 / Transcription Factor Fixation/Permeabilization Concentrate and Diluent | invitrogen      | Cat#: 2220751    |
| ELISA MAX™ Deluxe Set Mouse IL-17A                                             | Biolgend        | Cat#:432504      |
| Human CXCL16 ELISA kit                                                         | Finetest        | Cat#:EH0105      |
| Mouse CXCL16 ELISA kit                                                         | FineTest        | Cat#: EM0005     |
| Recombinant protein human CXCL16                                               | SinoBiological  | Cat#: 10834-H08H |
| Recombinant protein mouse IL-23 protein                                        | SinoBiological  | Cat#: CT028-M08H |
| Recombinant protein mouse CXCL16 protein                                       | Sino Biological | Cat#: 50591-M08H |

|                                                                       |                                  |               |
|-----------------------------------------------------------------------|----------------------------------|---------------|
| Recombinant protein mouse IL-17A                                      | Novoprotein                      | Cat#:CX14     |
| Recombinant protein mouse IL-1 $\beta$                                | Novoprotein                      | Cat#:C042     |
| Recombinant protein human IL-17A                                      | PeptoTech                        | Cat#:20017    |
| Recombinant protein human IL-1beta                                    | PeptoTech                        | Cat#: 200-01B |
| Human/ mouse Luminex Discovery Assay                                  | BD                               | no Cat#       |
| Mouse CXCL16 Antibody                                                 | R&D                              | Cat#:AF503    |
| InVivoMAb anti-mouse V $\gamma$ 2 TCR                                 | Bioxcell                         | Cat#:BE0168   |
| InVivoMAb polyclonal Armenian hamster IgG                             | Bioxcell                         | Cat#:BE0091   |
| InVivoPlus anti-mouse/rat IL-17A                                      | Bioxcell                         | Cat#:BP0173   |
| InVivoPlus mouse IgG1 isotype control                                 | Bioxcell                         | Cat#:BP0083   |
| Deposited data                                                        |                                  |               |
| Raw data files for bulk RNA sequencing: Epidermis and dermis in mouse | This paper                       | Submitting    |
| Raw data files for single cell RNA sequencing:mouse                   | This paper                       | Submitting    |
| Raw data files for single cell RNA sequencing:human                   | This paper                       | Submitting    |
|                                                                       |                                  |               |
| Experimental models:<br>Organisms/strains                             | SOURCE                           | IDENTIFIER    |
| C57BL/6                                                               | SLAC<br>Laboratory<br>Animal Co. | N/A           |
| Zbtb46-DTR mice                                                       | Jackson<br>Laboratories          | N/A           |

|                                    |                                                                                               |                                                                                             |
|------------------------------------|-----------------------------------------------------------------------------------------------|---------------------------------------------------------------------------------------------|
| Ube2l3 <sup>fl/fl</sup>            | Cyagen                                                                                        | N/A                                                                                         |
| K14-CreERT                         | Jackson Laboratories                                                                          | N/A                                                                                         |
| Rag1 <sup>-/-</sup>                | GemPharmatech                                                                                 | N/A                                                                                         |
| <b>Software and algorithms</b>     |                                                                                               |                                                                                             |
| GraphPad v9-10                     | GraphPad Software                                                                             | <a href="https://www.graphpad.com">https://www.graphpad.com</a>                             |
| ImageJ v1.51                       | National Institutes of Health (NIH)                                                           | <a href="https://imagej.nih.gov">https://imagej.nih.gov</a>                                 |
| GSEA v4.1.0                        | Subramanian, Tamayo, et al.<br><sup>49</sup><br>and Mootha, Lindgren, et al.<br><sup>50</sup> | <a href="http://www.gsea-msigdb.org">http://www.gsea-msigdb.org</a>                         |
| R(versions 3.0.0, 4.0.3 and 4.1.3) | The R Foundation                                                                              | <a href="https://www.r-project.org">https://www.r-project.org</a>                           |
| Cellranger v3.0.2 10x              | <a href="#">10x Genomics</a>                                                                  | <a href="https://www.10xgenomics.com/support">https://www.10xgenomics.com/support</a>       |
| Seurat 2.3.0/3.0                   | The R Foundation                                                                              | <a href="https://satijalab.org/seurat">https://satijalab.org/seurat</a>                     |
| Harmony                            | <a href="#">The R Foundation</a>                                                              | <a href="https://github.com/pardeike/HarmonyLun">https://github.com/pardeike/HarmonyLun</a> |
| SCENIC 1.1.2-2                     | The R Foundation                                                                              | <a href="https://github.com/aertslab/SCENIC">https://github.com/aertslab/SCENIC</a>         |
| Metascape v3.5                     | The R Foundation                                                                              | <a href="http://metascape.org/">http://metascape.org/</a>                                   |
| Cellchat                           | The R Foundation                                                                              | <a href="https://www.cellchat.org/">https://www.cellchat.org/</a>                           |

|                        |                          |                                                                                                                                                                                     |
|------------------------|--------------------------|-------------------------------------------------------------------------------------------------------------------------------------------------------------------------------------|
| Scrublet               | The R Foundation         | <a href="https://github.com/AllonKleinLab/scrublet">https://github.com/AllonKleinLab/scrublet</a>                                                                                   |
| Clusterprofiler v 3.12 | The R Foundation         | <a href="https://bioconductor.org/packages/release/bioc/html/clusterProfiler.html">https://bioconductor.org/packages/release/bioc/html/clusterProfiler.html</a>                     |
| CellphonDB V2          | The R Foundation         | <a href="https://github.com/ventolab/CellphoneDB?tab=readme-ov-file">https://github.com/ventolab/CellphoneDB?tab=readme-ov-file</a>                                                 |
| CytExpert Software     | Beckman Coulter          | <a href="https://www.mybeckman.cn/flow-cytometry/research-flow-cytometers/cytoflex/software">https://www.mybeckman.cn/flow-cytometry/research-flow-cytometers/cytoflex/software</a> |
| Photoshop              | Adobe                    | <a href="https://www.adobe.com/products/photoshop">https://www.adobe.com/products/photoshop</a>                                                                                     |
| Metascape              | Zhou et al <sup>24</sup> | <a href="https://metascape.org/gp/index.html#/main/step1">https://metascape.org/gp/index.html#/main/step1</a>                                                                       |

### 3 Bulk RNA-seq samples collection and data analysis

4 After sample's RNA extraction and detection were done, library construction and  
5 quality control were made by Illumina's NEBNext® Ultra™ RNA Library Prep Kit.  
6 Then, the different libraries were subjected to Illumina sequencing.

7 For quality control, the sequence was verified by fastp software  
8 (<https://github.com/OpenGene/fastp>). HISAT2 (v2.0.5) was used to map reads to the  
9 *mus musculus*. StringTie (<https://ccb.jhu.edu/software/stringtie>) was used to assemble  
10 the mapped reads of each sample. To estimate the expression levels of all transcripts,  
11 StringTie and ballgown  
12 (<http://www.bioconductor.org/packages/release/bioc/html/ballgown.html>) were used  
13 after the final transcriptome was generated. FPKM (fragment per kilobase of  
14 transcript per million mapped reads) value was calculated by StringTie and Ballgown  
15 to perform mRNAs expression abundance.

16 Differential expression analysis between two comparison combinations was  
17 performed using DESeq2 software (1.16.1). In mouse epidermal and dermal RNA-

seq, we took the P value  $<0.05$  as well as  $|\log_2\text{foldchange}|>1.5$  as the thresholds for significant differences. Finally, significant up- and down-regulated genes were derived. The GO enrichment analysis of differentially expressed genes was realized by clusterProfiler R software, and the GO term with corrected P-value less than 0.05 was taken as the GO term for significant enrichment of differentially expressed genes. and other high-throughput databases to understand the high-level functions and utility of biological systems such as cells, organisms, and ecosystems. We used clusterProfiler R software to analyze the statistical enrichment of differentially expressed genes in the KEGG pathway. In this paper, metascape (<https://metascape.org/gp/index.html#/main/step1>) was used to analyze the enrichment of up-regulated significantly differentially analyzed genes. Finally, the enriched pathways were displayed using the visualization tool provided on the website. We used a local version of the Gene Set Enrichment Analysis (GSEA) analysis tool (<http://www.broadinstitute.org/gsea/index.jsp>) to perform GSEA analyses on the GO, KEGG, and Reactome datasets of this species, respectively. Sequencing data from RNA-seq of mouse epidermis and dermis were subjected to ImmuneCellAI-mouse (<http://bioinfo.life.hust.edu.cn/ImmuCellAI-mouse/#/>) deconvolution to perform immune infiltration.

### **Human/ mouse Luminex Discovery Assay**

A custom-made Luminex® assay (LXSAHM; R&D Systems, Minneapolis, Minnesota, USA) was used to detect human and mouse cytokines and chemokines according to the manufacturer's protocol. Briefly, reagents were prepared as instructed. Tissue lysates were made by a RIPA buffer containing protease inhibitors and diluted 1:1 and incubated with the microparticle cocktail at RT for 2 h on a shaker at 800 rpm. Next, wells were washed 3× with wash buffer before incubation with biotin–antibody cocktail for 1 h at RT on a shaker at 800 rpm. Subsequently, wells were washed 3× with wash buffer and streptavidin-PE added for 30 min at RT. Wells

were then washed 3× with wash buffer and diluted in wash buffer until reading with the Bio-Plex 200 analyzer (BIO-RAD, Hercules, California, USA) within 60 min.

#### **Western blotting analysis**

Cells were lysed with RIPA buffer and lysates were boiled with 5 ×Loading buffer at 95°C for 10 minutes. Then, the samples were separated with SDS-PAGE gel and immunoblotted with the indicated antibodies. Supernatants of cells were collected and proteins were concentrated by centrifugal concentrators (Millipore). Densitometric analyses were performed using Gel-Pro Analyzer software V4.0 (Media Cybernetics, Bethesda, MD, USA).

#### **Immunofluorescence (IF) and immunohistochemistry (IHC) analyses**

In brief, cells were plated on coverslips in 12-well cultured plates, followed by 4% paraformaldehyde solution in PBS for 15 minutes. After washed by PBS, cells were treated with PBS containing 0.3% triton-X100 for 3 mins. Then, cells were washed again and treated with 10% goat blocking serum for 60 mins. After that, cells were primed with primary antibody followed by incubation with corresponding secondary antibody with Alexa Fluor 488 or 555 (Invitrogen). Nuclei were counterstained with DAPI mounting medium. IF assay was captured by fluorescence microscope (Leica DM5500B).

#### **Haematoxylin and eosin (H&E) staining**

Skin biopsies were fixed in 10% neutral-buffered formalin and then paraffined. The 4 µm sections were stained with hematoxylin and eosin.

72     **Supplementary Figure Legends**

73     **Fig.S1**

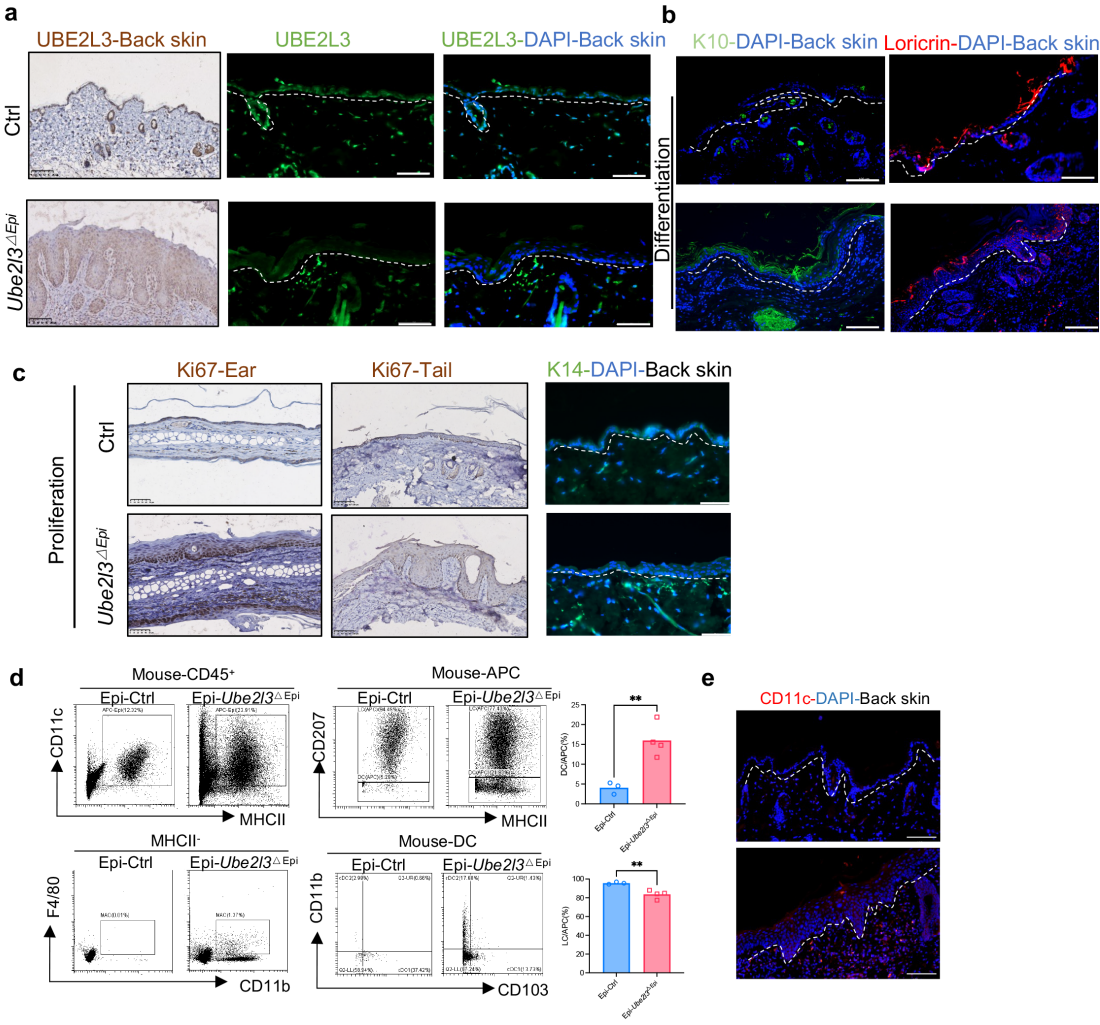

74

75

**Fig.S1. Spontaneous psoriasis-like dermatitis was detected in *Ube2l3*<sup>ΔEpi</sup> mice.**

(a) The immunochemistry and immunofluorescence of UBE2L3 in *Ube2l3*<sup>ΔEpi</sup> mice and ctrl mice (scale bar= 50μm). (b) The immunochemistry staining of K10 and Loricrin in the skin, ear and nails of *Ube2l3*<sup>ΔEpi</sup> mice and ctrl mice (scale bar=100μm). (c) Comparison of proliferation marker (Ki-67) and basal cells (K14<sup>+</sup>) by immunochemistry and immunofluorescence staining (scale bar=50μm). (d) Representative flow cytometry plots of CD45<sup>+</sup> cells, APC, MHCII<sup>+</sup> and DC and quantification of the percentage of APC and DC in epidermal back skin of *Ctrl* and *Ube2l3*<sup>ΔEpi</sup> mice. \*\*p<0.001. (e) Comparison of myeloid dendritic cells (CD11c<sup>+</sup>) in the back skin of *Ctrl* and *Ube2l3*<sup>ΔEpi</sup> mice using immunofluorescence (Scale bar=100μm).

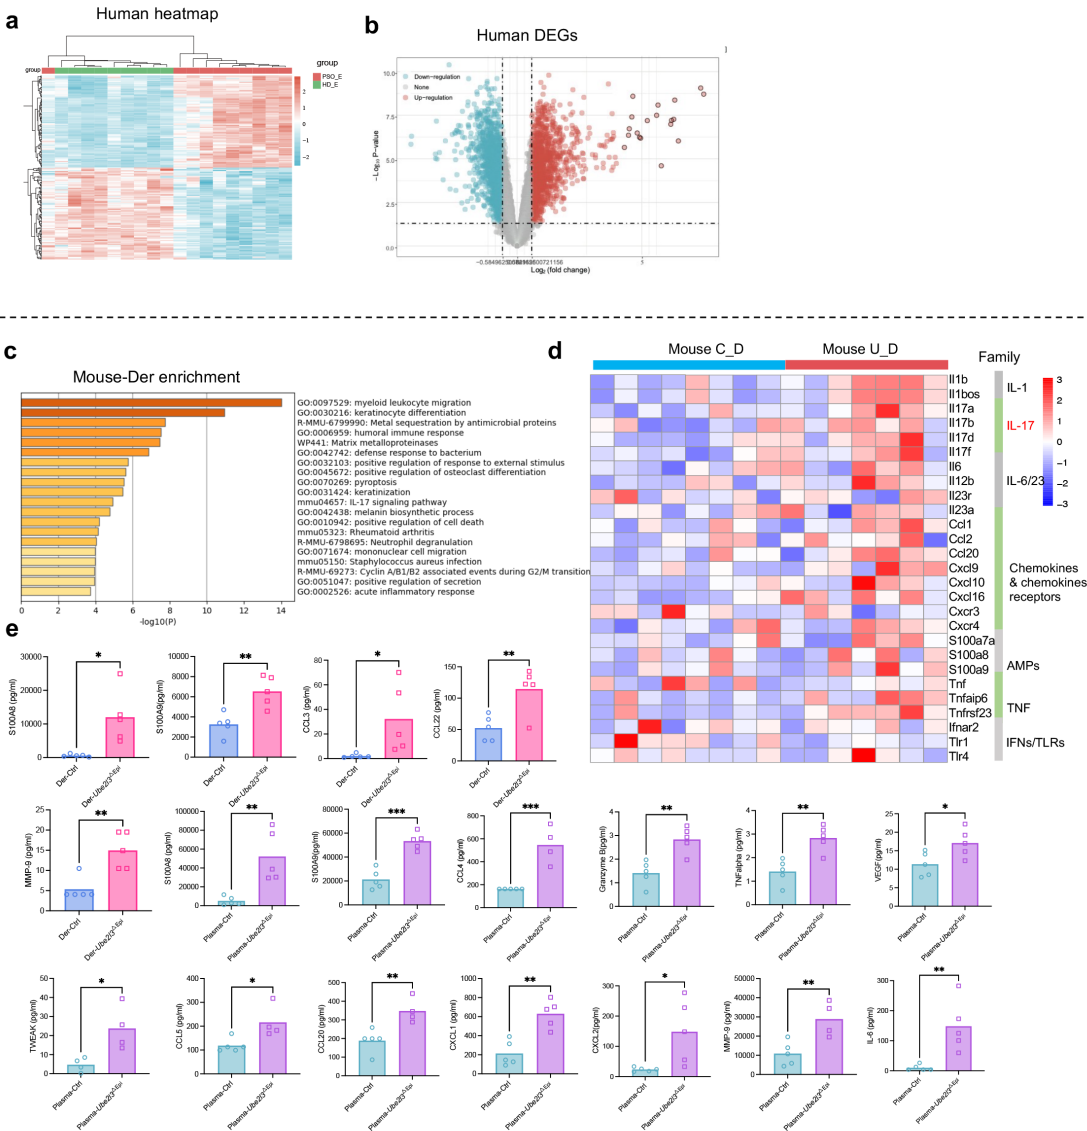

**Fig. S2 High significance showed in the epidermis of *Ube2l3*<sup>ΔEpi</sup> mice rather than dermis.**

(a) Heatmap analysis of GSE166388, GSE68937 and GSE68923 in psoriatic epidermis (PSO\_E) and healthy donors (HD\_E). (b) Different expressed genes (DEGs) were detected using  $p\text{-val} < 0.05$  and  $|\log_2\text{foldchange}| > 1.5$ , which is the same as mouse DEGs. (c) Up-regulated genes in the dermis of *Ube2l3*<sup>ΔEpi</sup> mice and Ctrl mice were chosen to do metascape enrichment. (d) Heatmap results in FPKM expression of representative cytokine and chemokine families of IL-1, IL-17, IL-6/IL-23, AMPs, TNF, TLRs, as well as IFNRs in the dermis of Ctrl mice (Mouse C\_D\_ and *Ube2l3*<sup>ΔEpi</sup> mice (Mouse U\_D)). (e) Protein illumina assay results of S100A8, S100A9, CCL13, CCL22 and MMP9 (pg/ml) in the dermis of Ctrl mice (Der-Ctrl) and *Ube2l3*<sup>ΔEpi</sup> mice (Der-*Ube2l3*<sup>ΔEpi</sup>). Der-Ctrl, n=5, Der-*Ube2l3*<sup>ΔEpi</sup>, n=5. Protein illumina assay results of S100A8, S100A9, CCL4, Granzyme B, TNFalpha, VEGF, TWEAK, CCL5, CCL20, CXCL1, CXCL2, MMP9, IL-6 (pg/ml) in the plasma of Ctrl mice (Plasma-Ctrl) and *Ube2l3*<sup>ΔEpi</sup> mice (Plasma-*Ube2l3*<sup>ΔEpi</sup>). Plasma-Ctrl, n=5, Plasma-*Ube2l3*<sup>ΔEpi</sup>, n=4 or 5. \*\*\* $p < 0.001$ , \*\* $p < 0.01$ , \* $p < 0.05$ .

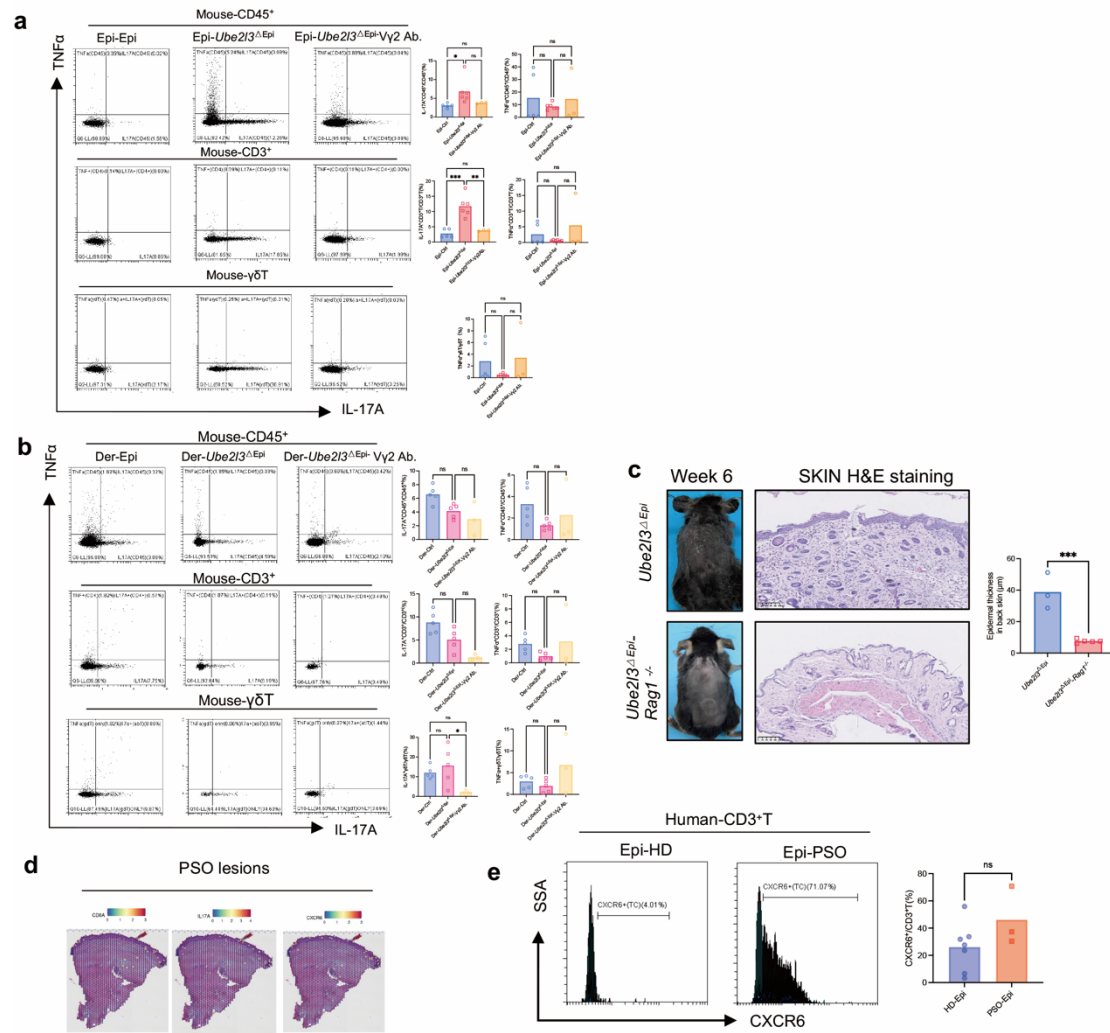**Fig.S3 Mouse dermis lymphocytes subpopulations.**

(a) The infiltration score of  $\gamma\delta$ T cells in the epidermis and dermis of Ctrl and *Ube2l3*<sup>ΔEpi</sup> mice, used by Immune AI-mouse<sup>51, 52</sup>. (b) Dot plot showing the differentially expressed genes in T cell subsets in healthy adult epidermis, n=2, and psoriatic epidermis, n= 3. (c) Flow cytometry results of percentage of TNFα and IL-17A in the dermis of mouse CD4<sup>+</sup>T and CD8<sup>+</sup>T between Ctrl and *Ube2l3*<sup>ΔEpi</sup> mice. The bar charts represented Fig.3j and (c) flow cytometric analysis. \*\*, p<0.01, ns, not significant. (d) Representative flow cytometric plots in the dermis of mouse control group (Der-Ctrl) and *Ube2l3*<sup>ΔEpi</sup> mice (Der-*Ube2l3*<sup>ΔEpi</sup>). Right bar charts were different proportion of cells in IL-17A<sup>+</sup>CD45<sup>+</sup>/CD45<sup>+</sup> cells, IL-17A<sup>+</sup>CD3<sup>+</sup>/CD3<sup>+</sup> T cells, IL-17A<sup>+</sup>αβT/αβT cells, IL-17A<sup>+</sup>γδT/γδT cells, IL-17A<sup>+</sup>CD4<sup>+</sup>/CD4<sup>+</sup>T cells, IL-

119 17A<sup>+</sup>CD8<sup>+</sup>/CD8<sup>+</sup>Tcells, TNF $\alpha$ <sup>+</sup> CD45<sup>+</sup>/ CD45<sup>+</sup> cells, TNF $\alpha$ <sup>+</sup> CD3<sup>+</sup>/ CD3<sup>+</sup> T cells,  
120 TNF $\alpha$ <sup>+</sup> $\alpha$  $\beta$ T/  $\alpha$  $\beta$ T cells, TNF $\alpha$ <sup>+</sup> $\gamma$  $\delta$ T/ $\gamma$  $\delta$ T cells, TNF $\alpha$ <sup>+</sup>CD4<sup>+</sup>/CD4<sup>+</sup>T cells, TNF $\alpha$ <sup>+</sup>CD8<sup>+</sup>/  
121 CD8<sup>+</sup>T cells between two groups. \*\*, p<0.01, \*, p<0.05, ns, not significant.

122



CD3<sup>+</sup> T cells, IL-17A<sup>+</sup>γδT/γδT cells, TNFα<sup>+</sup>γδT/γδT cells in Der-Ctrl, Der-  
*Ube2l3*<sup>ΔEpi</sup>, and in dermis of *Ube2l3*<sup>ΔEpi</sup> when treated with Vγ2Ab (Der- *Ube2l3*<sup>ΔEpi</sup>-  
Vγ2Ab). (c) The experimental procedure of generating *Ube2l3*<sup>ΔEpi</sup>-*Rag1*<sup>-/-</sup> mice in  
Mice and ethics of Online methods. Representative images and the H&E staining in  
the skin of *Ube2l3*<sup>ΔEpi</sup>-*Rag1*<sup>-/-</sup> mice and *Ube2l3*<sup>ΔEpi</sup> mice. scale bar, 100um. \*\*\*,  
p<0.001. *Ube2l3*<sup>ΔEpi</sup>, n=3, *Ube2l3*<sup>ΔEpi</sup>-*Rag1*<sup>-/-</sup>, n=5.(d) Spatial transcriptomics of  
CD8A, IL17A and CXCR6 genes in psoriatic lesions in GSE206391. (e)  
Representative plots and proportion of CXCR6 in CD3<sup>+</sup>T cells between Epi-HD and  
Epi-PSO group. ns, not significant. Epi-HD, n=6, Epi-PSO, n=3. Data are presented  
as means ± S.E.M

143

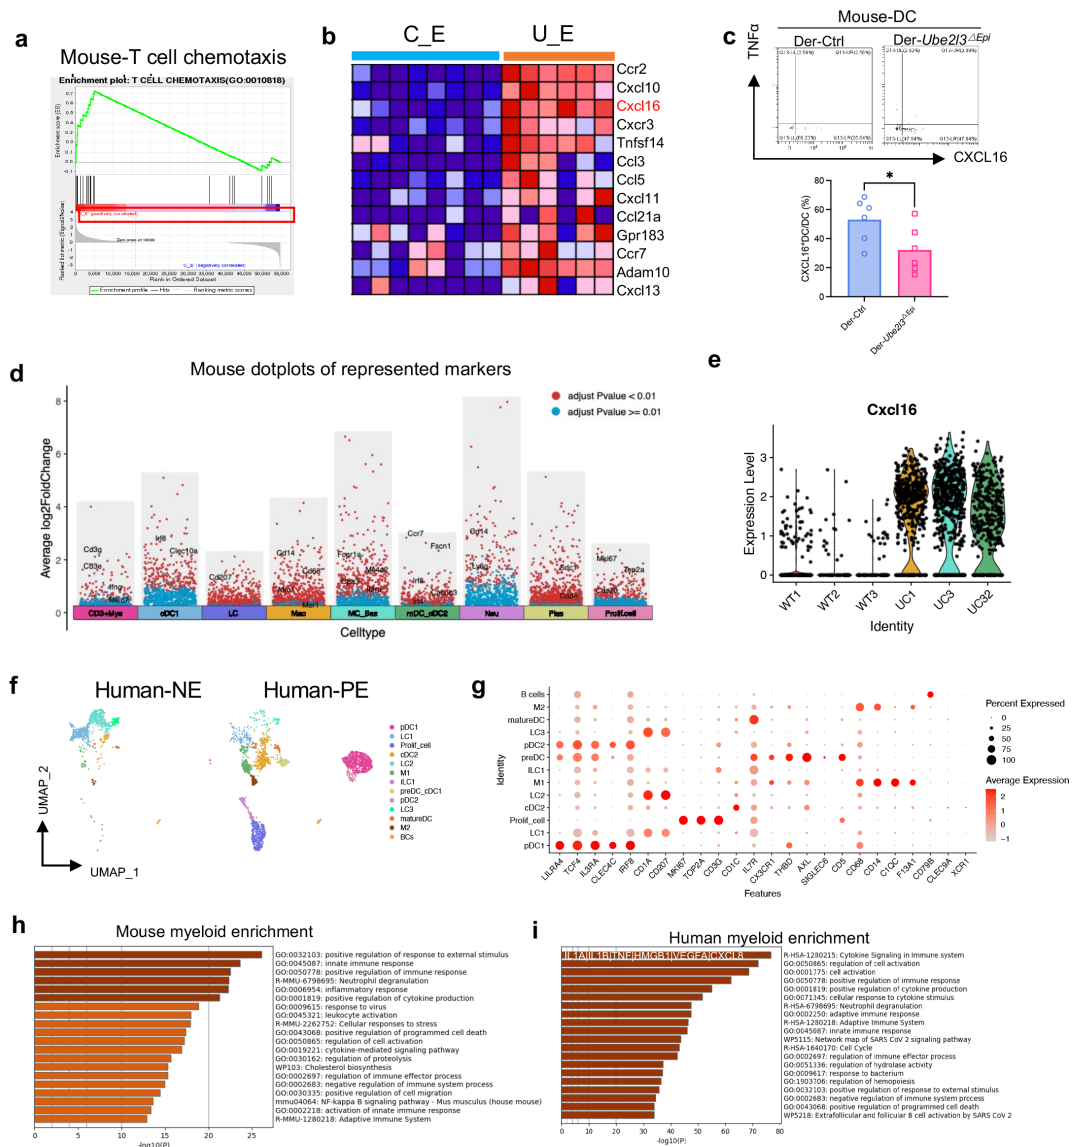

**Fig. S5 Similarity of myeloid cells between human psoriasis and mouse psoriasis-like lesion**

(a) T cell chemotaxis was increased in U\_E group in GSEA of bulk-RNA sequencing.

(b) Heatmap showing significantly positive expressed genes in T cell chemotaxis signaling pathway. (c) Representative cytometric plots and percentage of CXCL16 in DC (dendritic cells) in dermis in Der-Ctrl and Der- *Ube2l3*<sup>ΔEpi</sup>. \*, p<0.01. n=6 independent per group. (d) Representative markers used in classifying mouse myeloid

cells. MC\_Bas, mast cell and basophils, specified by *Cpa3*, *Ms4a2* and *Il3ra*. Neu, neutrophils, specified by *Cd14*, *Ly6g*. LC, Langerhans cells, specified by *Cd207*. Mac, macrophage, specified by *Clqa*, *Clqb* and *Cd68*. cDC1, type 1 DC, expressed *Xcr1*, *Irf8* and *Clec9a*, less *Irf4*. cDC2, type 2 DC, high expression of *Itgam* and *Irf4*, as well as migration marker of *Fscn1*, *Cacnb3*, *Ccr7*. (e) The expression level of *Cxcl16* in scRNA-seq in each sample (CE, including WT1, WT2 and WT3, UE, including UC1, UC2, UC32). (f-g) UMAP visualization of all myeloid cells

pDC, specified by *LILRA4*, *IL3RA*, *TCF4*, *CLEC4C*, LC1, LC2, LC3, Langerhans cell cluster1, 2 and 3, specified by *CD207* and *CD1A*. Prolif.T, proliferated associated T cell, specified by *TOP2A*, *MKI67*, *CD8A* and *CD3D*. cDC2, type 2 DC, specified by *CLEC10A*, *CD1C* and *ITGAX*. M1, macrophage, specified by *CIQB*, *CIQC*, *M2*, macrophage type 2, specified by *CD68*, *CD14*. ILC1, specified by *IL7R* and low *CD3G*. Pre-DC, specified by *CX3CR1* and *SIGLEC6*. mDC, mature DC, specified by *CCR7*, *LAMP3*. B cell, specified by *CD79A*, *CD79B*<sup>53</sup>. (h-i) Top ten signaling pathway in scRNA-seq of mouse myeloid cell enrichment used by metascape and human myeloid cell enrichment.

## References:

1. A. Subramanian *et al.*, Gene set enrichment analysis: a knowledge-based approach for interpreting genome-wide expression profiles. *Proc Natl Acad Sci U S A* **102**, 15545-15550 (2005).
2. V. K. Mootha *et al.*, PGC-1alpha-responsive genes involved in oxidative phosphorylation are coordinately downregulated in human diabetes. *Nat Genet* **34**, 267-273 (2003).
3. Y. Zhou *et al.*, Metascape provides a biologist-oriented resource for the analysis of systems-level datasets. *Nat Commun* **10**, 1523 (2019).
4. Y. R. Miao *et al.*, ImmuCellAI-mouse: a tool for comprehensive prediction of mouse immune cell abundance and immune microenvironment depiction. *Bioinformatics* **38**, 785-791 (2022).
5. Y. R. Miao *et al.*, ImmuCellAI: A Unique Method for Comprehensive T-Cell Subsets Abundance Prediction and its Application in Cancer Immunotherapy. *Adv Sci (Weinh)* **7**, 1902880 (2020).

185 6. M. Collin, V. Bigley, Human dendritic cell subsets: an update. *Immunology* **154**, 3-20  
186 (2018).

187
